# Supplementary material
Source: PubMed Central journal article supplement (PMC4909371)

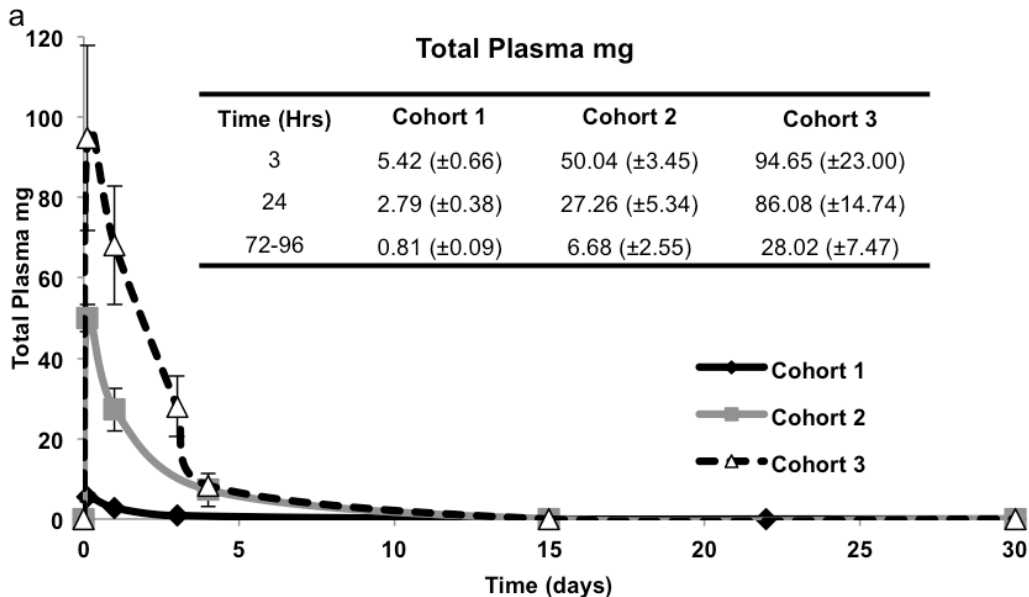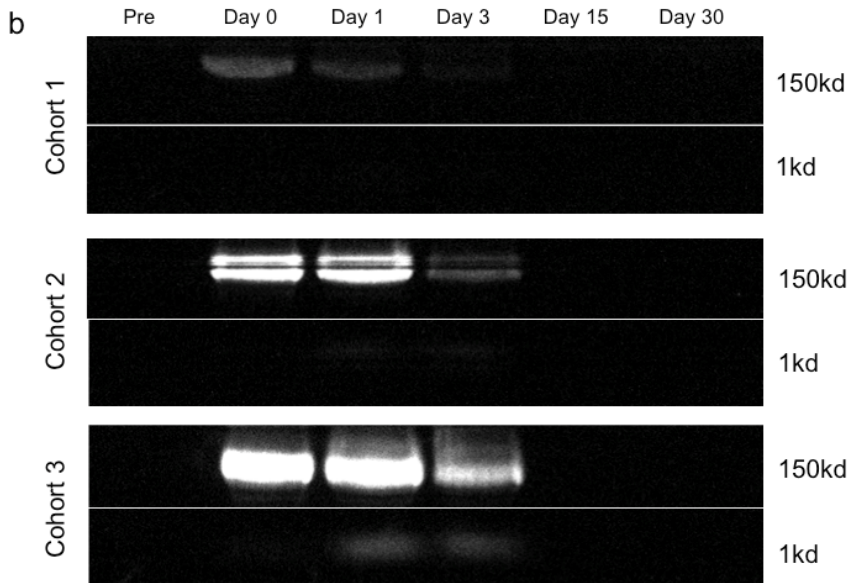

Supplement: NIHMS687387-supplement-Figure_S1.pdf [file NIHMS687387-supplement-Figure_S1.pdf]

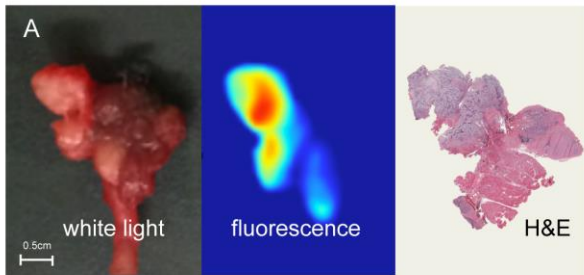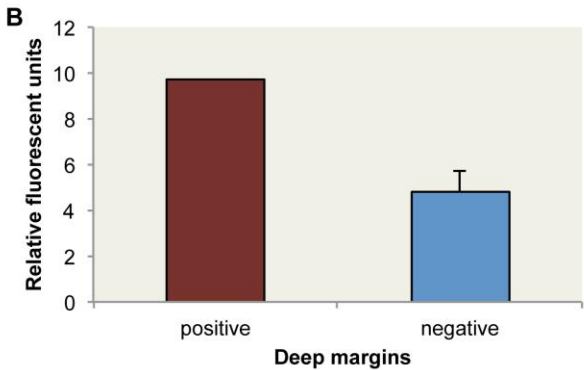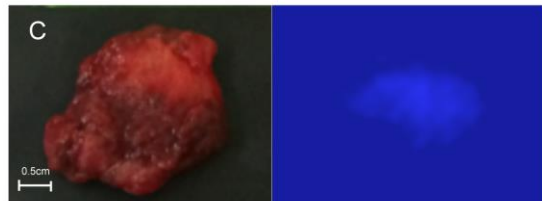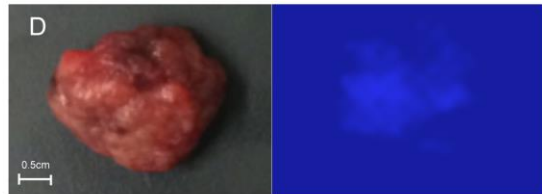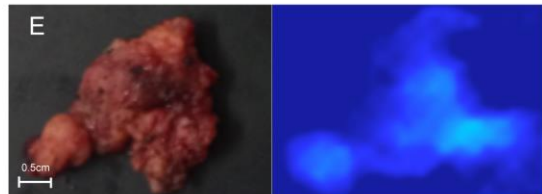

Supplement: NIHMS687387-supplement-Figure_S2.pdf [file NIHMS687387-supplement-Figure_S2.pdf]

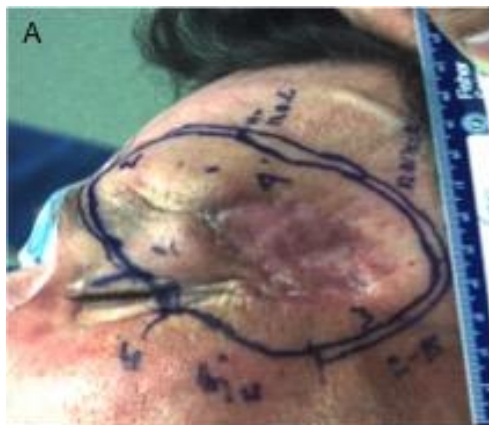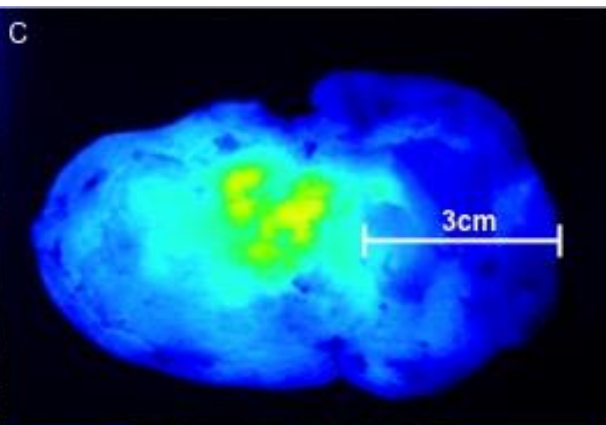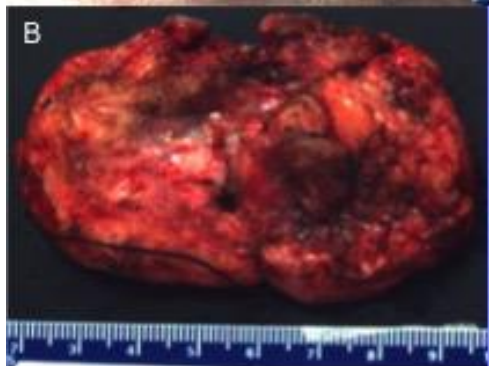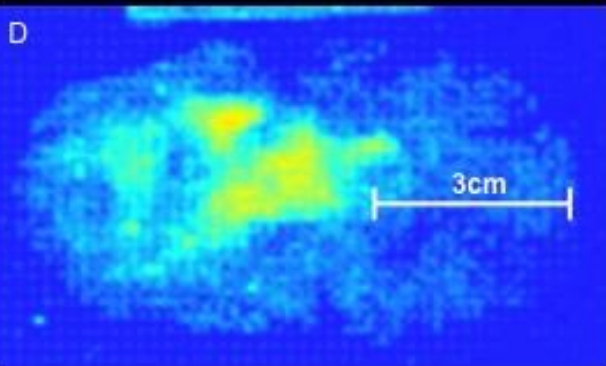

Supplement: NIHMS687387-supplement-Figure_S3.pdf [file NIHMS687387-supplement-Figure_S3.pdf]
